# Supplementary material for: 2D ternary vanadium phosphorous chalcogenide with strong in-plane optical anisotropy
Source: Royal Society of Chemistry journal article supplement (doi:10.1039/d1qi00390a), 2021-01-01
Supplement: d1qi00390a1.pdf [file d1qi00390a1.pdf]

## Supplementary Information

### 2D ternary vanadium phosphorous chalcogenide with strong in-plane optical anisotropy

Jianwei Su,<sup>a</sup> Wanfu Shen,<sup>b</sup> Jiazhen Chen,<sup>a</sup> Sijie Yang,<sup>a</sup> Jia Liu,<sup>c</sup> Xin Feng,<sup>a</sup> Yinghe Zhao,<sup>a</sup> Chunguang Hu,<sup>b</sup> Huiqiao Li<sup>a</sup> and Tianyou Zhai<sup>\*a</sup>

<sup>a</sup> State Key Laboratory of Materials Processing and Die & Mould Technology, School of Materials Science and Engineering, Huazhong University of Science and Technology (HUST), Wuhan 430074, P. R. China

E-mail: zhaity@hust.edu.cn

<sup>b</sup> State Key Laboratory of Precision Measuring Technology and Instruments, Tianjin University, Tianjin 300072, P. R. China

<sup>c</sup> Gemmological Institute, China University of Geosciences, Wuhan 430074, P. R. China

### Contents

|                                                                                                                                                  |   |
|--------------------------------------------------------------------------------------------------------------------------------------------------|---|
| <b>Fig. S1&amp;S2</b> The crystal structure of $V_2P_4S_{13}$ -----                                                                              | 2 |
| <b>Fig. S3</b> Scanning electron microscope image of single crystal $V_2P_4S_{13}$ -----                                                         | 2 |
| <b>Fig. S4</b> Energy dispersive spectrum of $V_2P_4S_{13}$ nanosheet-----                                                                       | 3 |
| <b>Fig. S5</b> Optical microscope image of $V_2P_4S_{13}$ flake for angle-resolved polarized Raman spectroscopy measurements-----                | 3 |
| <b>Table S1</b> Polar plots of typical Raman modes under parallel and vertical polarization configurations-----                                  | 3 |
| <b>Fig. S6</b> Optical microscope image of $V_2P_4S_{13}$ flake under transmittance mode for polarized absorption spectroscopy measurements----- | 4 |

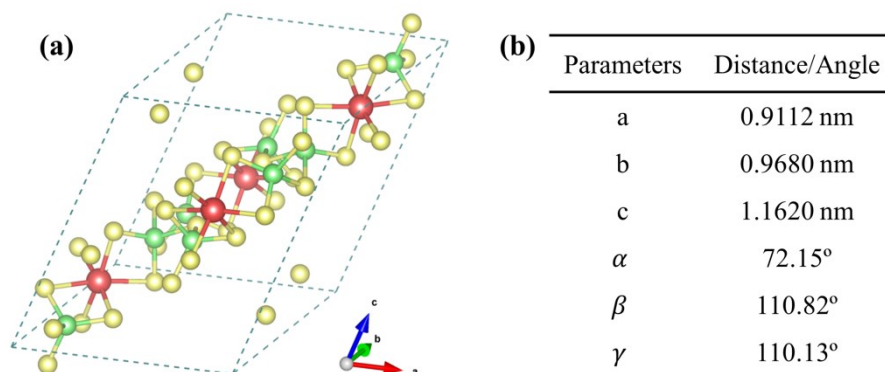

**Fig. S1** (a) The unit cell structure of triclinic  $V_2P_4S_{13}$ . (b) Lattice parameters of  $V_2P_4S_{13}$ .

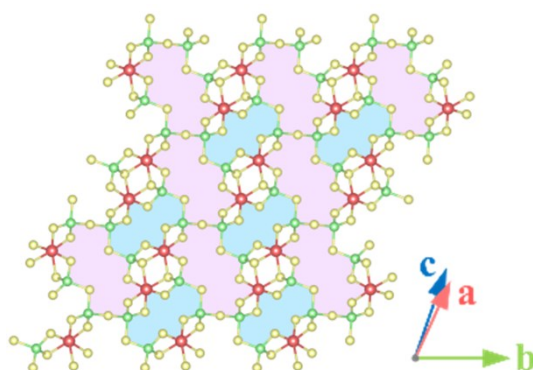

**Fig. S2** Top view of distinctive porous 2D  $V_2P_4S_{13}$  with anisotropic distribution of angstrom-scale pores indicated by different fill colors.

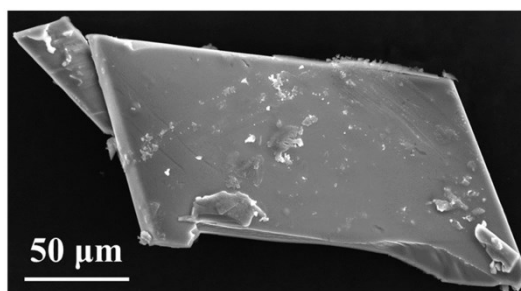

**Fig. S3** Scanning electron microscope image of single crystal  $V_2P_4S_{13}$ .

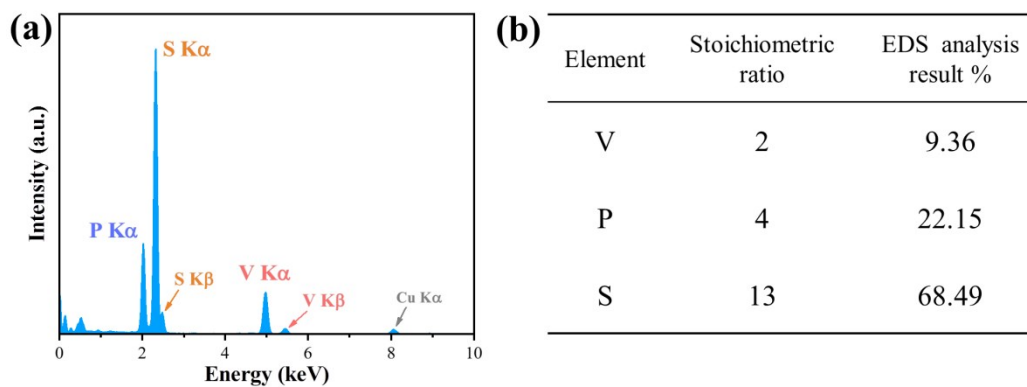

**Fig. S4** (a) Energy dispersive spectrum of  $V_2P_4S_{13}$  nanosheet on Cu grid. (b) Quantitative analysis results of energy dispersive spectrum of  $V_2P_4S_{13}$  nanosheet.

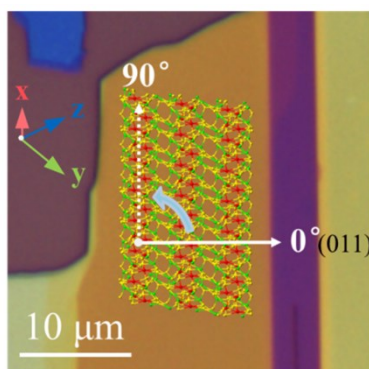

**Fig. S5** Optical microscope image of  $V_2P_4S_{13}$  flake for angle-resolved polarized Raman spectroscopy measurements.

**Table S1** Polar plots of selected Raman modes under parallel and vertical polarization configurations.

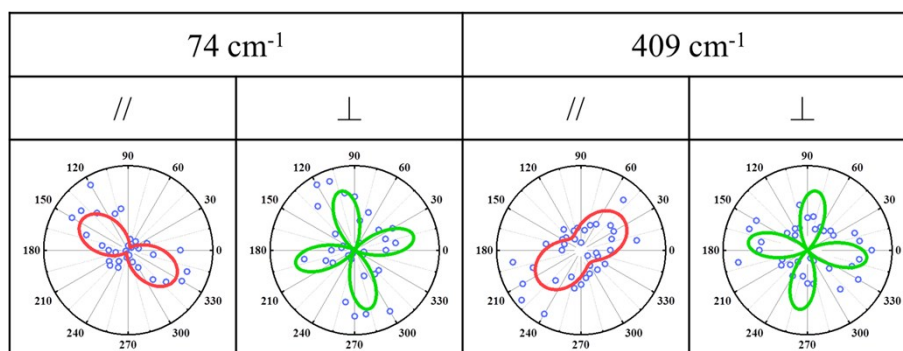

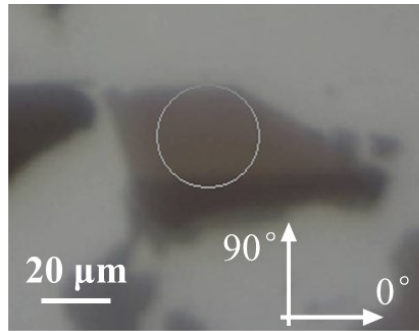

**Fig. S6** Optical microscope image of  $V_2P_4S_{13}$  flake under transmittance mode for polarization-resolved absorption spectroscopy measurements.
